# Supplementary material for: IKKε isoform switching governs the immune response against EV71 infection
Source: PubMed Central journal article supplement (PMC8172566; doi:10.1038/s42003-021-02187-x), 2021-06-02

## Supplementary Information

### **IKK $\epsilon$ isoform switching governs the immune response against EV71 infection**

Ya-Ling Chang<sup>1,2</sup>, Yu-Wen Liao<sup>1,2</sup>, Min-Hsuan Chen<sup>2</sup>, Sui-Yuan Chang<sup>1,3</sup>, Yao-Ting Huang<sup>4,8</sup>, Bing-Ching Ho<sup>2,8</sup>, Sung-Liang Yu<sup>1,2,3,5,6,7,8</sup>

**1** Department of Clinical Laboratory Sciences and Medical Biotechnology, College of Medicine, National Taiwan University, Taipei, Taiwan

**2** Centers of Genomic and Precision Medicine, National Taiwan University, Taipei, Taiwan

**3** Department of Laboratory Medicine, National Taiwan University Hospital, Taipei, Taiwan

**4** Department of Computer Science and Information Engineering, National Chung Cheng University, Chia-Yi, Taiwan

**5** Institute of Medical Device and Imaging, College of Medicine, National Taiwan University, Taipei, Taiwan

**6** Graduate Institute of Pathology, College of Medicine, National Taiwan University, Taipei, Taiwan

**7** Graduate Institute of Clinical Medicine, National Taiwan University College of Medicine, Taipei, Taiwan



| Section details         | Title                                                                                                | Page |
|-------------------------|------------------------------------------------------------------------------------------------------|------|
| <b>Methods</b>          | Droplet digital PCR analysis                                                                         | 3    |
| <b>Tables</b>           |                                                                                                      |      |
| Supplementary Table 1   | Enriched pathways with isoform switching genes in EV71 infection                                     | 4    |
| Supplementary Table 2   | List of primers and probes                                                                           | 5    |
| Supplementary Table 3   | The raw data of ddPCR                                                                                | 6    |
| <b>Figures</b>          |                                                                                                      |      |
| Supplementary Figure 1  | The pathway enriched by isoform switching genes in EV71 infection                                    | 7    |
| Supplementary Figure 2  | IKK $\epsilon$ v2 transcriptionally induces ISGs expressions in EV71 infection through IRF7          | 10   |
| Supplementary Figure 3  | EV71 infection promotes ubiquitination                                                               | 12   |
| Supplementary Figure 4  | IKK $\epsilon$ v2 increases IRF7 phosphorylation and IRF7 translocation in the presence of ubiquitin | 14   |
| Supplementary Figure 5  | The interaction of IKK isoforms and IRF7                                                             | 17   |
| Supplementary Figure 6  | The expression levels of HA-ubiquitin, referred to Figure 5                                          | 19   |
| Supplementary Figure 7  | Full-scan images of representative Western blots, referred to Figure 1                               | 22   |
| Supplementary Figure 8  | Full-scan images of representative Western blots, referred to Figure 2                               | 23   |
| Supplementary Figure 9  | Full-scan images of representative Western blots, referred to Figure 3                               | 24   |
| Supplementary Figure 10 | Full-scan images of representative Western blots, referred to Figure 4                               | 25   |
| Supplementary Figure 11 | Full-scan images of representative Western blots, referred to Figure 5                               | 26   |
| Supplementary Figure 12 | Full-scan images of representative Western blots, referred to Supplementary Figure 2                 | 28   |
| Supplementary Figure 13 | Full-scan images of representative Western blots, referred to Supplementary Figure 3                 | 29   |
| Supplementary Figure 14 | Full-scan images of representative Western blots, referred to Supplementary Figure 4                 | 30   |
| Supplementary Figure 15 | Full-scan images of representative Western blots, referred to Supplementary Figure 5                 | 31   |
| Supplementary Figure 16 | Full-scan images of representative Western blots, referred to Supplementary Figure 6                 | 32   |

## Supplementary Methods

### Droplet digital PCR analysis

Three commercially available probes purchased from Thermo Fisher were used to detect IKK $\epsilon$  isoforms in which Hs01063858-m1 detects all the three IKK $\epsilon$  isoforms, Hs01069870\_m1 detects both IKK $\epsilon$  v1 and v2 and Hs01063855\_g1 detects both IKK $\epsilon$  v1 and v3. After ddPCR assays, we subtracted copies of Hs01069870\_m1 (detecting v1 and v2) from Hs01063858-m1 (detecting v1, v2, and v3) to have IKK $\epsilon$  v3. Similarly, we subtracted copies of Hs01063855\_g1 (detecting v1 and v3) from Hs01063858-m1 (detecting v1, v2, and v3) to have IKK $\epsilon$  v2. Finally, copies of Hs01063858-m1 minus IKK $\epsilon$  v3 and IKK $\epsilon$  v2 leaves IKK $\epsilon$  v1. Ratio of individual IKK $\epsilon$  isoform was calculated by copy number of each IKK $\epsilon$  isoform divided by total copies of three isoforms.

**Supplementary Table 1. Enriched pathways with isoform switching genes in EV71 infection**

| <b>Rank</b> | <b>Pathway</b>                       | <b>Entities</b> | <b>Genes</b>                           | <b><i>p</i> value</b> |
|-------------|--------------------------------------|-----------------|----------------------------------------|-----------------------|
| 1           | Toll-like receptor signaling pathway | 6               | IRAK4, AKT1, IKBKE, MYD88, IRF3, SPP1  | 0.022                 |
| 2           | PPAR signaling pathway               | 5               | PPARD, DBI, SCP2, ACAA1, ANGPTL4       | 0.024                 |
| 3           | Neurotrophin signaling pathway       | 6               | IRAK4, AKT1, BDNF, CAMK2B, SH2B1, TP73 | 0.047                 |
| 4           | Apoptosis                            | 5               | IRAK4, AKT1, TNFRSF10B, MYD88, IL1RAP  | 0.049                 |

**Supplementary Table 2. List of primers and probes**

| <b>Gene name</b>             | <b>Sequence (5'-3')</b>            |
|------------------------------|------------------------------------|
| IFNb-SYBR-F                  | ATTGCCTCAAGGACAGGATG               |
| IFNb-SYBR-R                  | GGCCTTCAGGTAATGCAGAA               |
| OAS1-SYBR-F                  | CCCCATTATTGAAAAGTACCTGAGA          |
| OAS1-SYBR-R                  | GCCGGGTCCAGGATCAC                  |
| ISG56-SYBR-F                 | CAGAACGGCTGCCTAATTTACA             |
| ISG56-SYBR-R                 | GTGGGTCTGCTTTTTCTCTGT              |
| ISG20-SYBR-F                 | CCCTGCGGGTGCTGAGT                  |
| ISG20-SYBR-R                 | TGTCCAAGCAGGCTGTTCTG               |
| Mxa-SYBR-F                   | GCTACTGTGGCCAGAAAATC               |
| Mxa-SYBR-R                   | TCATACTGGCTGCACAGGTTGT             |
| <b>Promoter Luc reporter</b> | <b>Sequence (5'-3')</b>            |
| OAS1-F                       | CCCGGTACCCTTAACAAAAAGAAAAGAGAC     |
| OAS1-R                       | TTTAAGCTTTTTACCACCTTGGACACACA      |
| ISG56-F                      | TAAGGTACCGCACCCAGCCAAGAATCATT      |
| ISG56-R                      | CGCAAGCTTAGATCTGGCTATTCTGTCTT      |
| ISG20-F                      | AAAGGTACCCCAAATCCCCTTGGTGAAA       |
| ISG20-R                      | AAAAAGCTTCTCTCACCTGCCTGCCTCTG      |
| Mxa-F                        | ACCGGTACCCCAAAGCTCACCAGTATCAA      |
| Mxa-R                        | ATAAAGCTTCTCTGCTACCAGGCTGAGGA      |
| <b>Expression vector</b>     | <b>Sequence (5'-3')</b>            |
| IRF7-HindIII-F               | AAAAAGCTTATGGCCTTGGCTCCTGAGAGGGCAG |
| IRF7-BamHI-R                 | AAAGGATCCGGCGGGCTGCTCCAGCTCCATAAGG |
| <b>Digital Probe</b>         | <b>Target exon boundary</b>        |
| Hs01063858_m1                | NM_014002.3 Exon 21-22             |
| Hs01069870_m1                | NM_014002.3 Exon 2-3               |
| Hs01063855_g1                | NM_014002.3 Exon 19-20             |

Supplementary Table 3. The raw data of ddPCR

| Sample                                         | Probes            |                   |                   |
|------------------------------------------------|-------------------|-------------------|-------------------|
|                                                | Hs01063858        | Hs01069870        | Hs01063855        |
| RD_Mock infection                              | 3330              | 2960              | 2780              |
| RD_4 h.p.i.                                    | 5140              | 4450              | 3820              |
| RD_8 h.p.i.                                    | 1750              | 1436              | 1026              |
| SH-SY5Y_Mock infection                         | 2620              | 2120              | 2440              |
| SH-SY5Y_12 h.p.i.                              | 3260              | 2120              | 2900              |
| SH-SY5Y_24 h.p.i.                              | 2440              | 1656              | 2140              |
| <b>Copies of each IKK<math>\epsilon</math></b> |                   |                   |                   |
|                                                | IKK $\epsilon$ v1 | IKK $\epsilon$ v2 | IKK $\epsilon$ v3 |
| RD_Mock infection                              | 2410              | 550               | 370               |
| RD_4 h.p.i.                                    | 3130              | 1320              | 690               |
| RD_8 h.p.i.                                    | 712               | 724               | 314               |
| SH-SY5Y_Mock infection                         | 1940              | 180               | 500               |
| SH-SY5Y_12 h.p.i.                              | 1760              | 360               | 1140              |
| SH-SY5Y_24 h.p.i.                              | 1356              | 300               | 784               |
| <b>Ratio of each IKK<math>\epsilon</math></b>  |                   |                   |                   |
|                                                | IKK $\epsilon$ v1 | IKK $\epsilon$ v2 | IKK $\epsilon$ v3 |
| RD_Mock infection                              | 72%               | 17%               | 11%               |
| RD_4 h.p.i.                                    | 61%               | 26%               | 13%               |
| RD_8 h.p.i.                                    | 41%               | 41%               | 18%               |
| SH-SY5Y_Mock infection                         | 74%               | 7%                | 19%               |
| SH-SY5Y_12 h.p.i.                              | 54%               | 11%               | 35%               |
| SH-SY5Y_24 h.p.i.                              | 56%               | 12%               | 32%               |

a

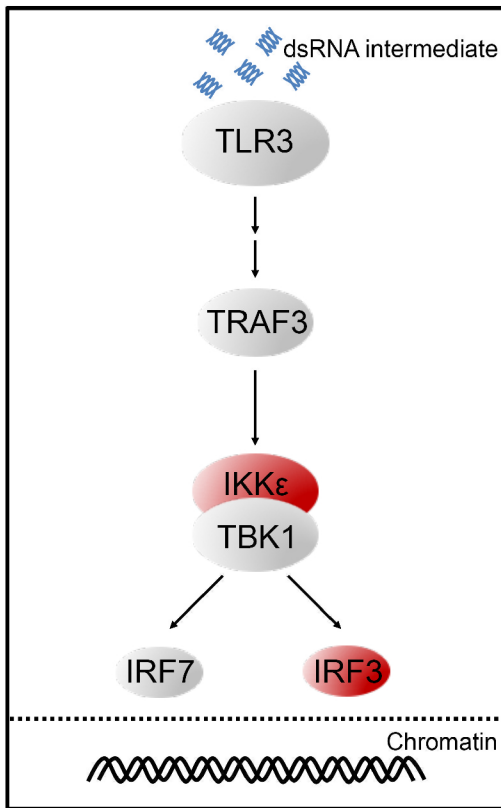

b

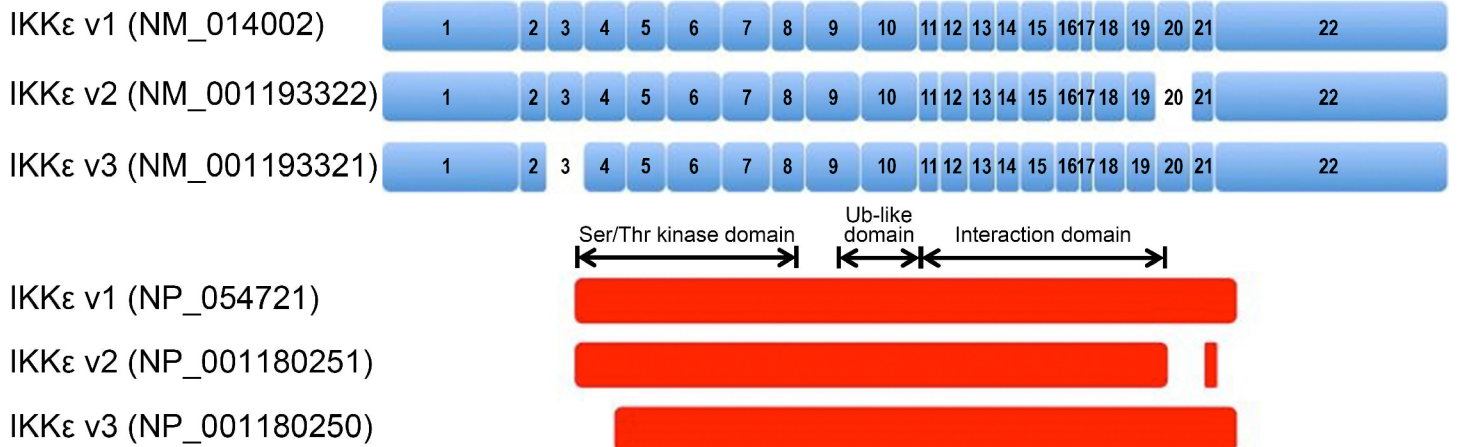

c

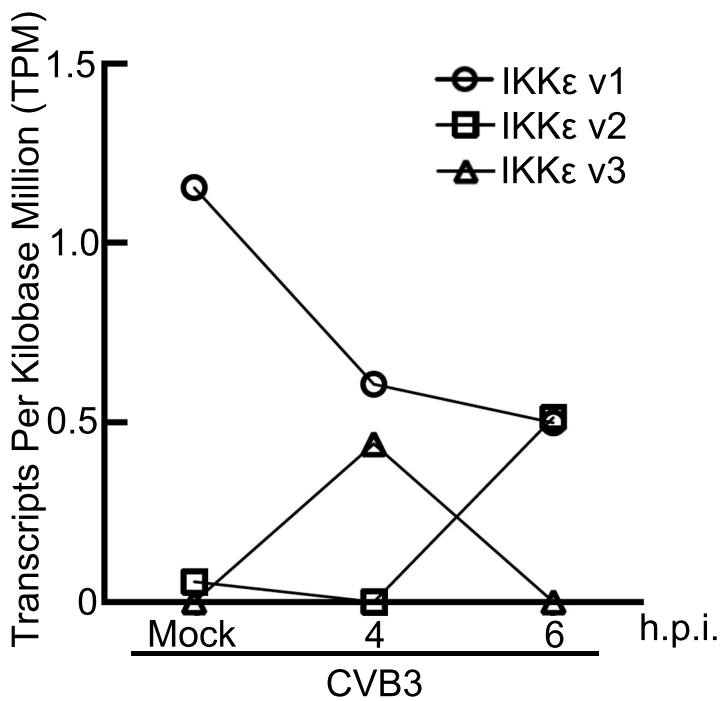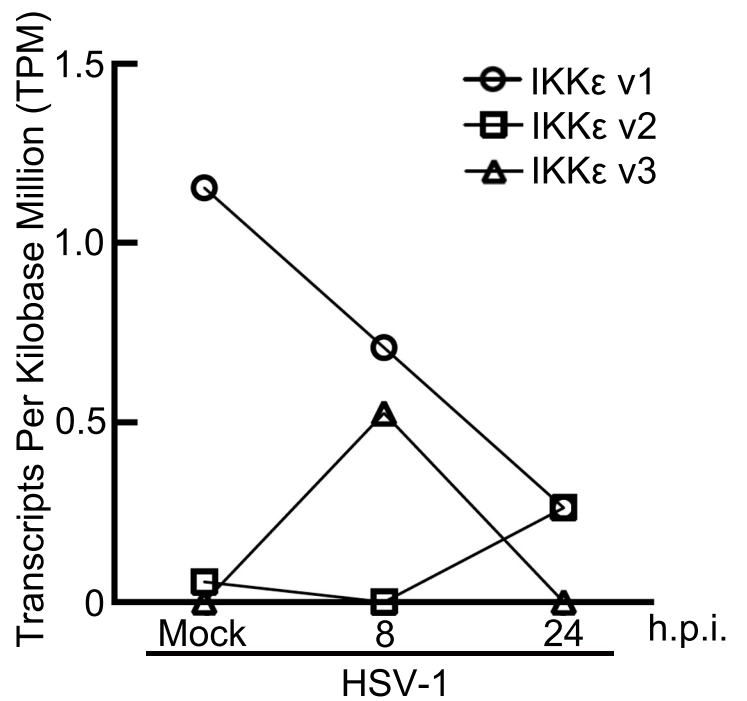

**Supplementary Fig. 1: The pathway enriched by isoform switching genes in EV71 infection.**

a. Toll-like receptor signaling pathway enriched in EV71 infection. The isoform switching genes identified in EV71 infection were adapted to DAVID Bioinformatics Resources analysis and the Toll-like receptor signaling pathway was ranked as top-one pathway with most significance ( $p$  value= 0.021). The illustrated pathway is a part of Toll-like receptor signaling pathway referenced from DAVID Bioinformatics Resources. The red circle and the gray circle represented the gene with and without isoform switching in EV71 infection, respectively.

b. Illustration of IKK $\epsilon$  isoforms. IKK $\epsilon$  gene possesses three isoforms: isoform 1 (IKK $\epsilon$  v1, NM\_014002; NP\_054721) contains full-length coding DNA sequence (CDS) while v2 (IKK $\epsilon$  v2, NM\_001193322; NP\_001180251) and v3 (IKK $\epsilon$  v3, NM\_001193321; NP\_001180250) truncates exon 20 and exon 3, respectively.

In protein level, IKK $\epsilon$  v2 is defected in coiled-coil domain functioned as protein-protein interaction and IKK $\epsilon$  v3 is trimmed in kinase domain contrast to IKK $\epsilon$  v1.

c. IKK $\epsilon$  isoform switching is measured by RNA-Seq in CVB3 and HSV-1 infected HeLa cells. IKK $\epsilon$  v2 was up-regulated while IKK $\epsilon$  v1 was down-

regulated in response to CVB3 (left panel) and HSV-1 (right panel) infection  
determined by RNA-Seq.



**a**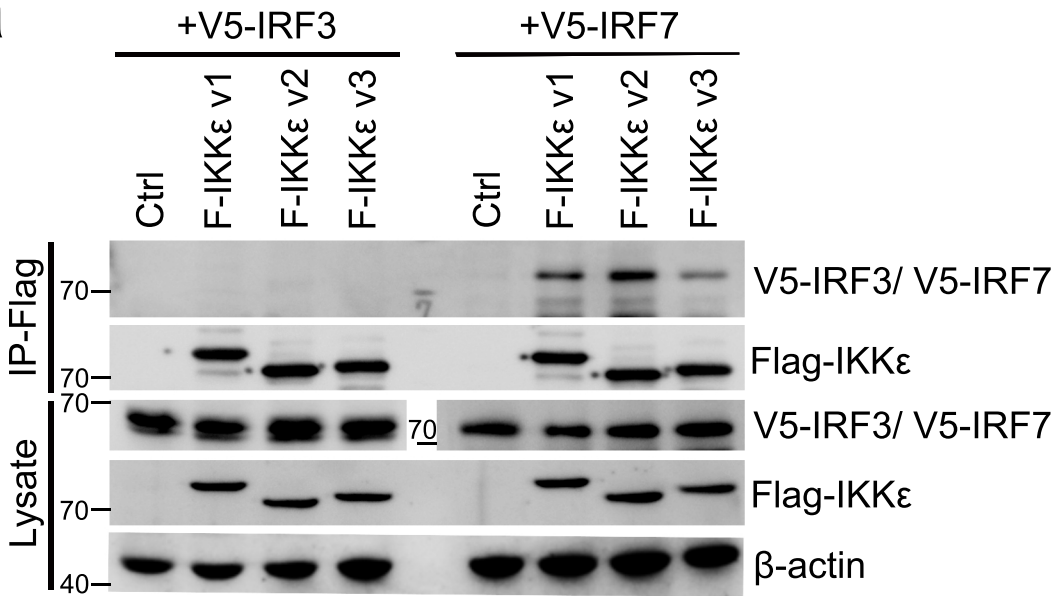**b**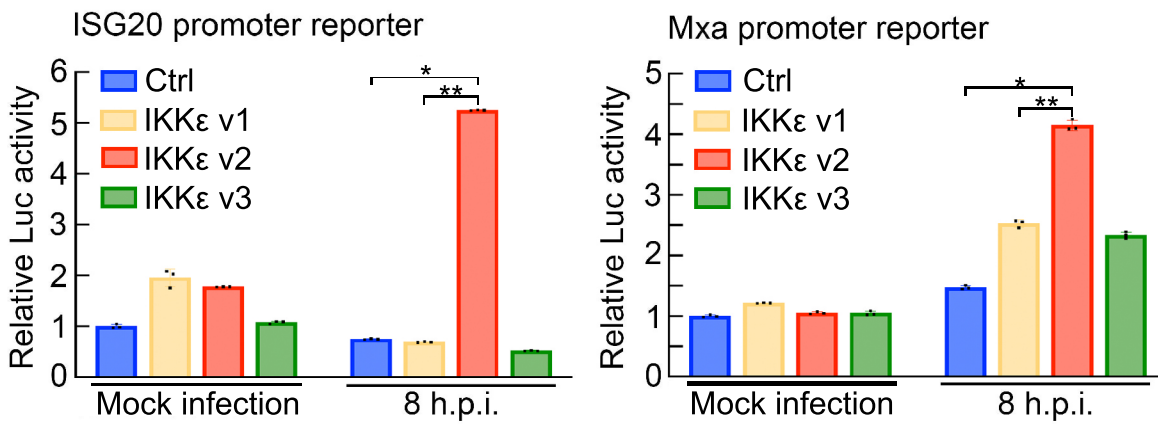**c**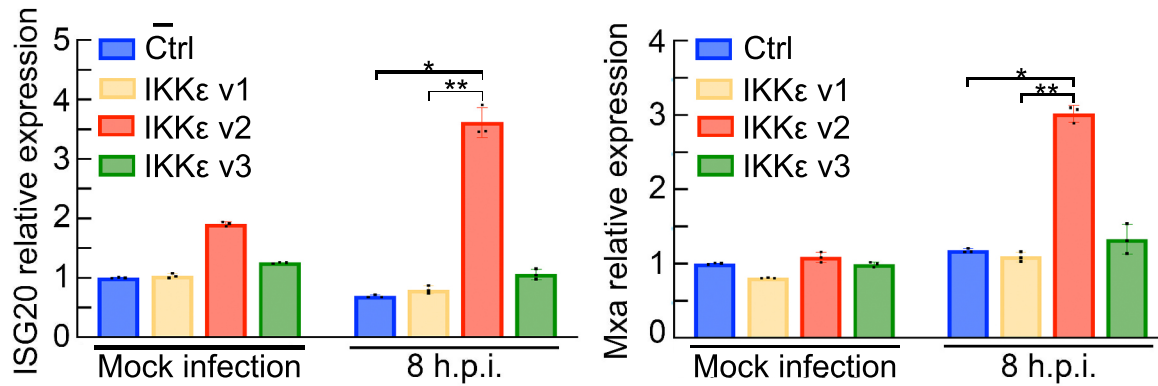**d**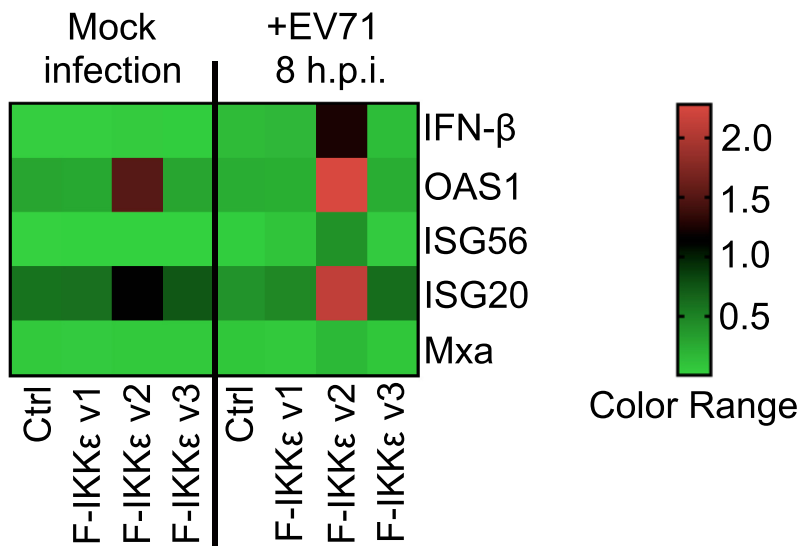

**Supplementary Fig. 2: IKK $\epsilon$  v2 transcriptionally induces ISGs****expressions in EV71 infection through IRF7.**

a. IKK $\epsilon$  preferentially binds to IRF7. Each Flag-IKK $\epsilon$  isoform was co-transfected with V5-IRF3 or V5-IRF7 in HEK293T cells. Flag-IKK $\epsilon$  was immunoprecipitated with anti-Flag beads. V5-IRF3 (left panel) and V5-IRF7 (right panel) were detected by anti-V5 antibody.

b, c. IKK $\epsilon$  v2 up-regulates promoter activities and expressions of MxA and ISG20. Each IKK $\epsilon$  isoform was ectopically expressed in RD cells accompanied with the indicated ISG promoter followed by EV71 infection. The promoter activities (b) and ISGs expressions (c) were measured at indicated h.p.i.. The data are normalized with vector control (Ctrl) in mock infection group. \* and \*\* represent  $p$  value  $<0.05$  as compared with Ctrl group and IKK $\epsilon$  v1 group, respectively. All data presented are mean  $\pm$  SD (n=3).

d. The heat map of ISGs expressions in ectopically IKK $\epsilon$  isoform-expressed RD cells, referred to Fig. 2b, 2d, S2a and S2b. The color scale corresponds to the mean for each gene.

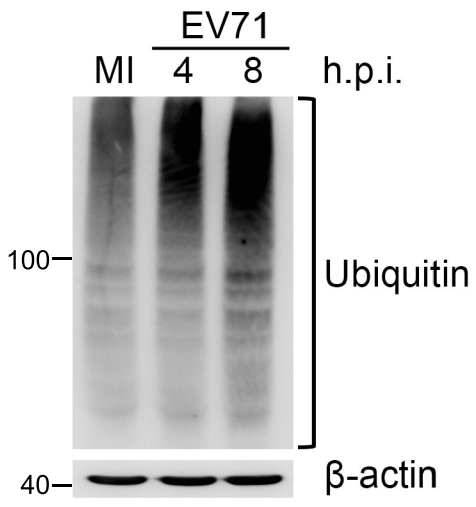

**Supplementary Fig. 3: EV71 infection promotes ubiquitination.**

RD cells were infected with EV71 at 10 m.o.i. and harvested at indicated h.p.i..

The total lysates were adapted to immunoblot analysis with anti-ubiquitin antibody.  $\beta$ -actin was served as an internal control. MI: mock infection

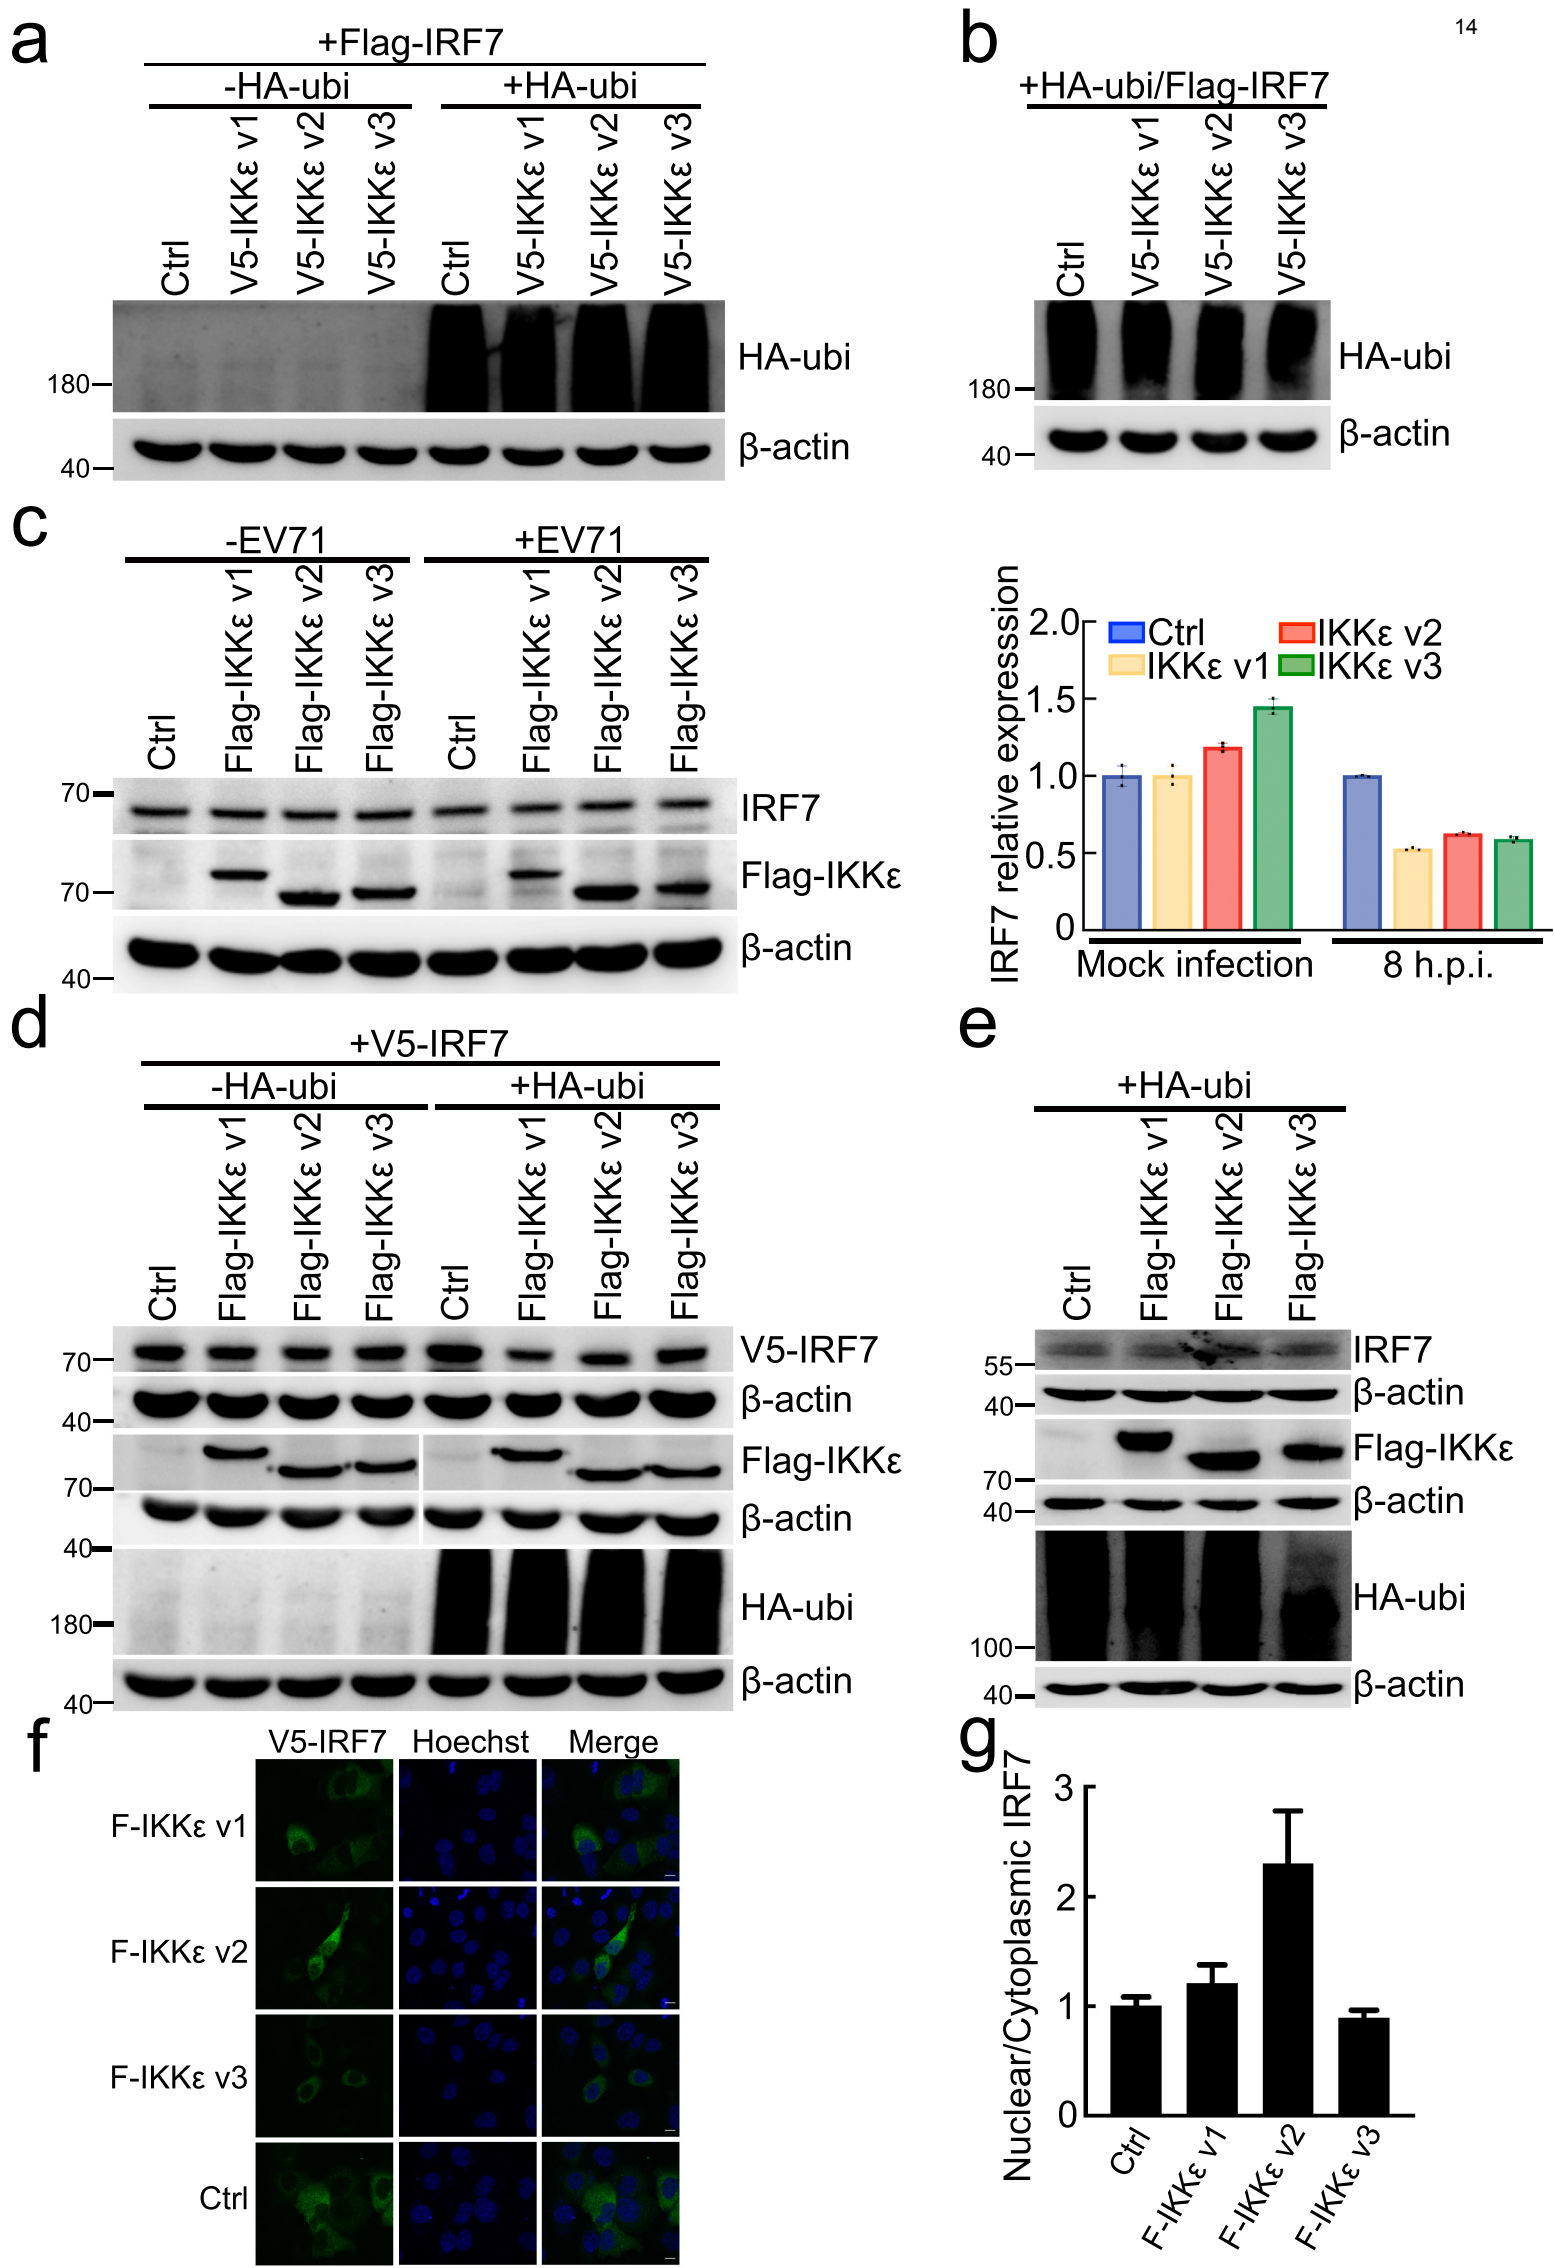

**Supplementary Fig. 4: IKK $\epsilon$  v2 increases IRF7 phosphorylation and IRF7 translocation in the presence of ubiquitin.**

a, b. The expression levels of HA-ubiquitin referred to Fig. 3a, 3b. HEK293 or HeLa cells were transfected with indicated plasmids and total lysates were loaded to perform immunoblot with indicated antibodies.  $\beta$ -actin served as an internal control.

c. IRF7 mRNA and protein were not induced by IKK $\epsilon$  v2. RD cells were ectopically expressed Flag- IKK $\epsilon$  followed by EV71 infection. Total lysates were loaded to perform immunoblot with indicated antibodies.  $\beta$ -actin served as an internal control (left panel). RNA expression of IRF7 was measured by quantitative real-time PCR and normalized with Ctrl in mock infection group (right panel). All data presented are mean  $\pm$  SD (n=3).

d, e. The expression levels of HA-ubiquitin referred to Fig. 3d, 3e. HeLa cells were transfected with indicated plasmids and total lysates were loaded to perform immunoblot with indicated antibodies.  $\beta$ -actin served as an internal control.

f. IKK $\epsilon$  v2 facilitates IRF7 translocation by immunofluorescence analysis. The immunofluorescence images of cells treated with the same condition used in Figure 3d. Scale bar: 10um

g. The ratio of nuclear IRF7 to cytoplasmic IRF7 in Supplementary Figure 3f. The ratios of F- IKK $\epsilon$  isoforms were normalized to that of Ctrl.

**a**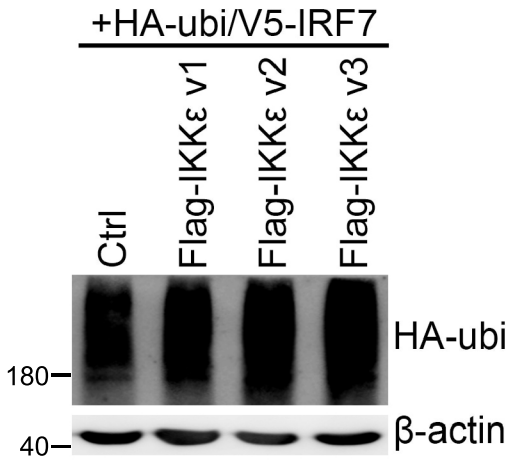**b**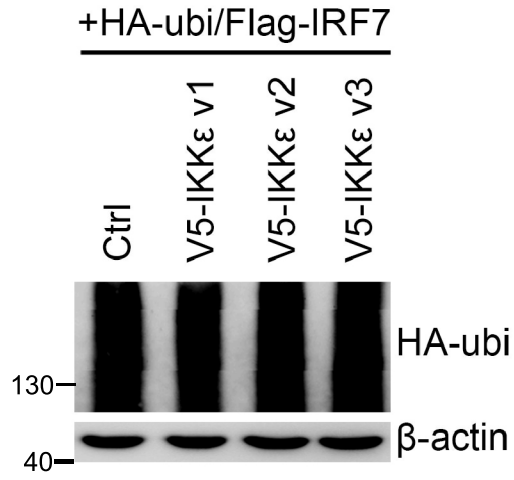**c**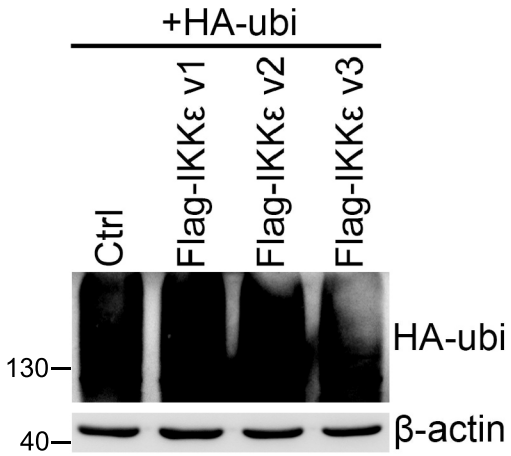**d**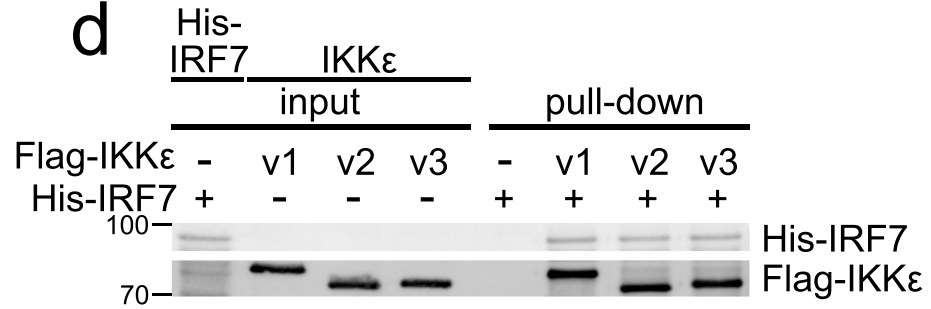



**Supplementary Fig. 5: The interaction of IKK isoforms and IRF7.**

a-c. The expression levels of HA-ubiquitin, referred to Fig. 4. HEK293 cells were transfected with indicated expressing plasmids and total lysates were loaded to perform immunoblot with anti-HA antibody.  $\beta$ -actin served as an internal control.

d. The direct interaction of IRF7 and IKK $\epsilon$  isoforms. Each Flag-IKK $\epsilon$  isoform was purified by anti-Flag beads from Flag-IKK $\epsilon$ -expressed HEK293T cells and incubated with 1  $\mu$ g of His-IRF7, which was purified from *E. coli*. for 2 hours at 4°C. After washing for three times, the bound His-IRF7 was analyzed by Western blotting with anti-His antibody.

**a**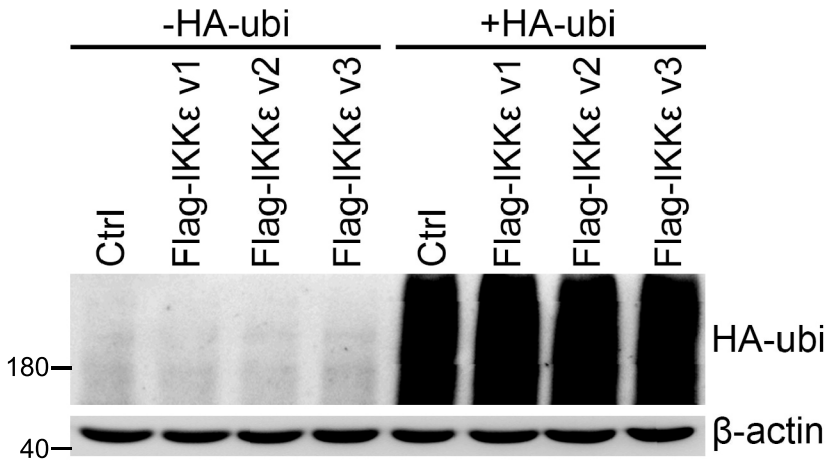**b**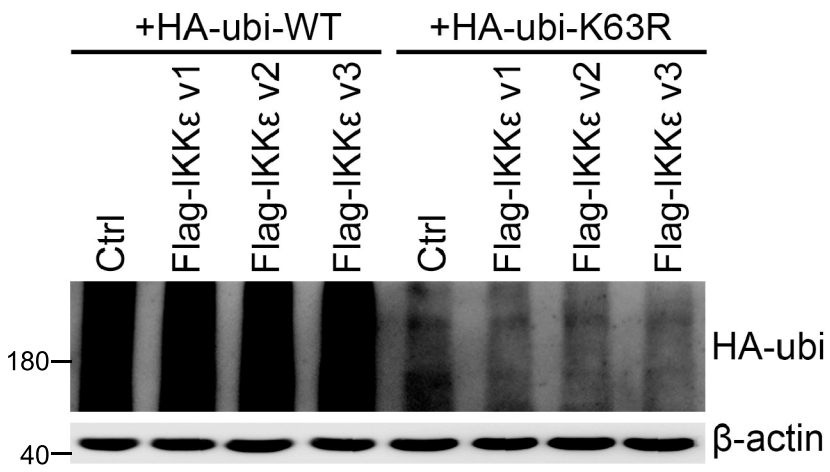**c**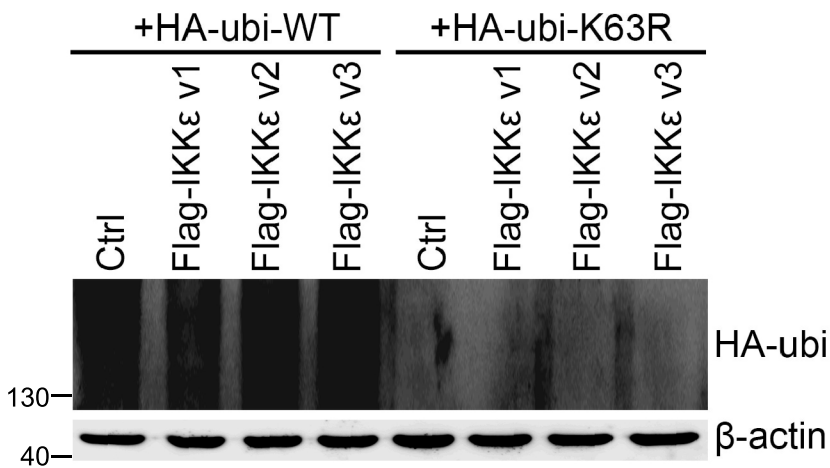

**Supplementary Fig. 6: The expression levels of HA-ubiquitin, referred to Figure 5.**

a-c. HEK293 cells were transfected with indicated expressing plasmids and total lysates were loaded to perform immunoblot with anti-HA antibody.  $\beta$ -actin served as an internal control.

**Supplementary Figure 7-11: Full-scan images of representative Western blots, referred to Figure 1-5**

1c

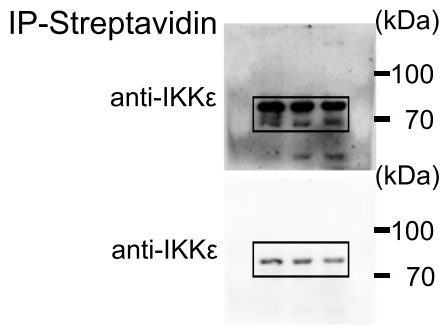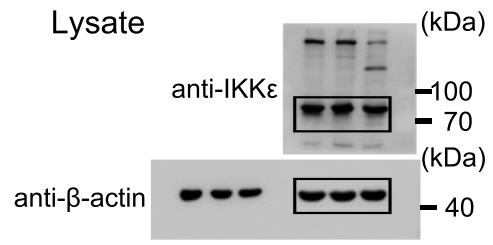

2f

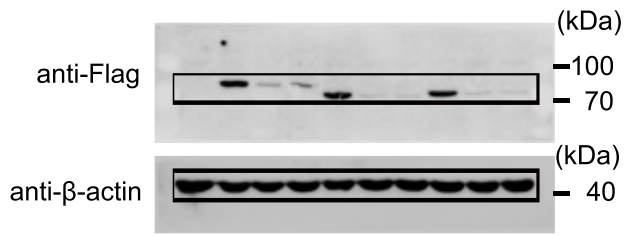

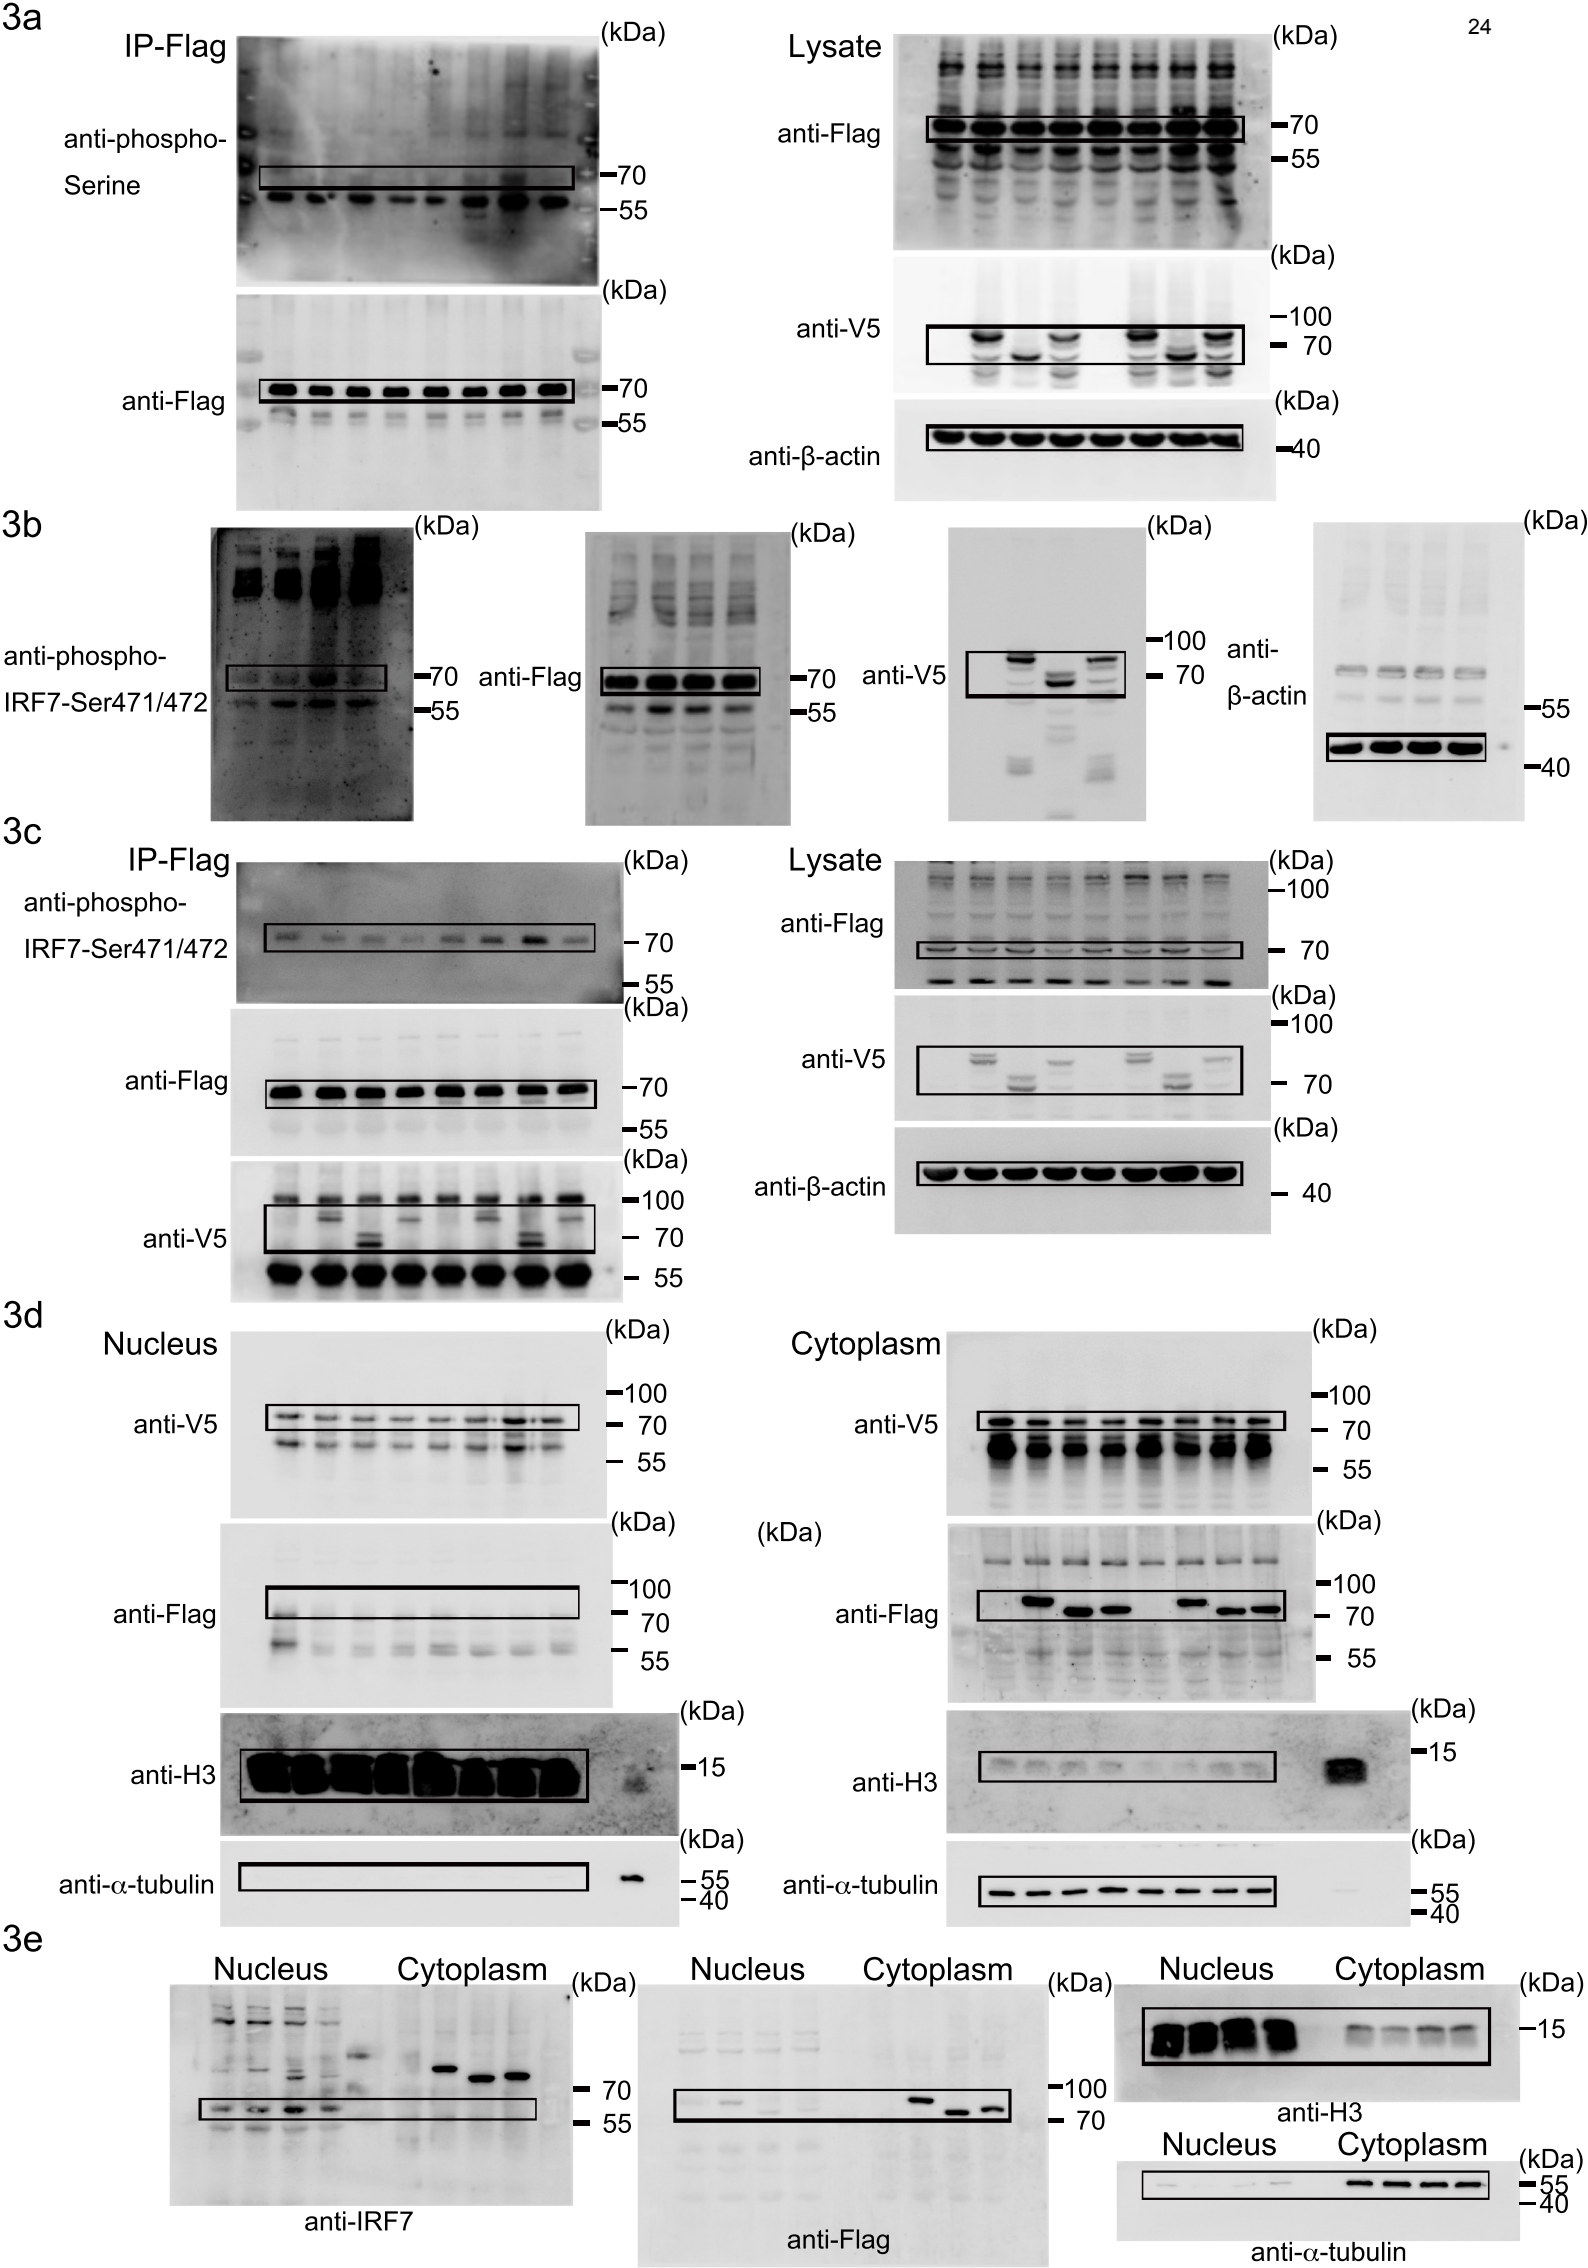

4a

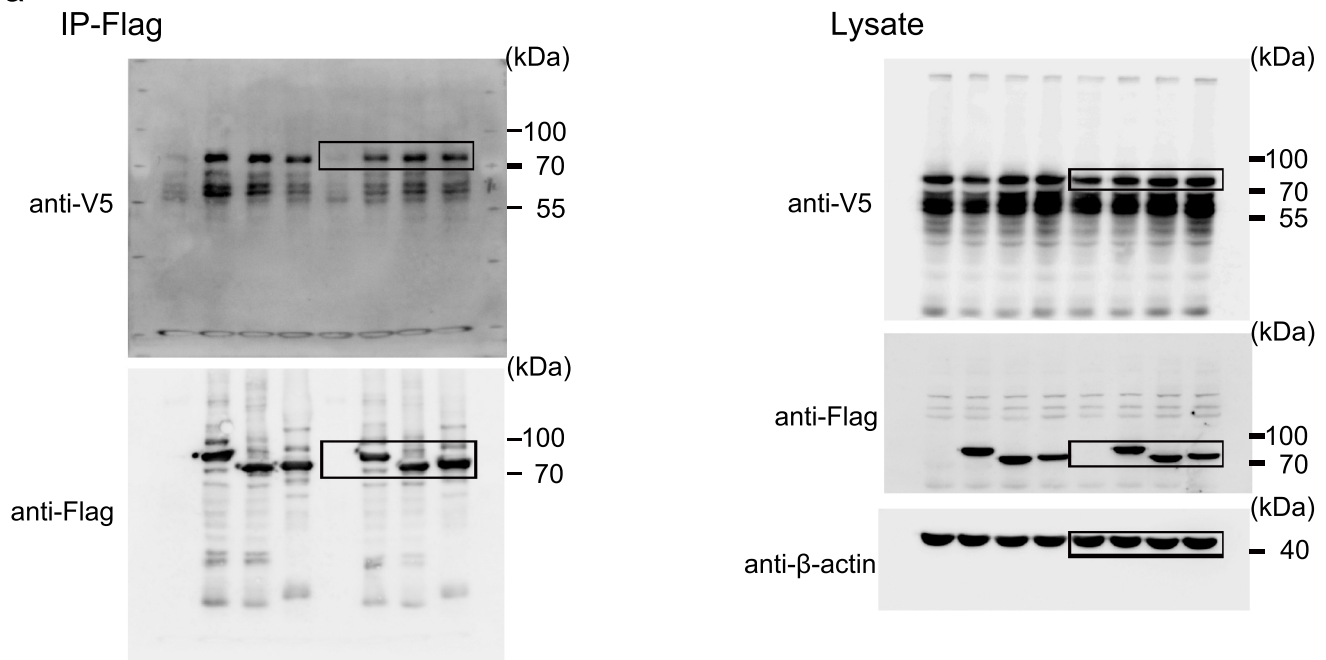

4b

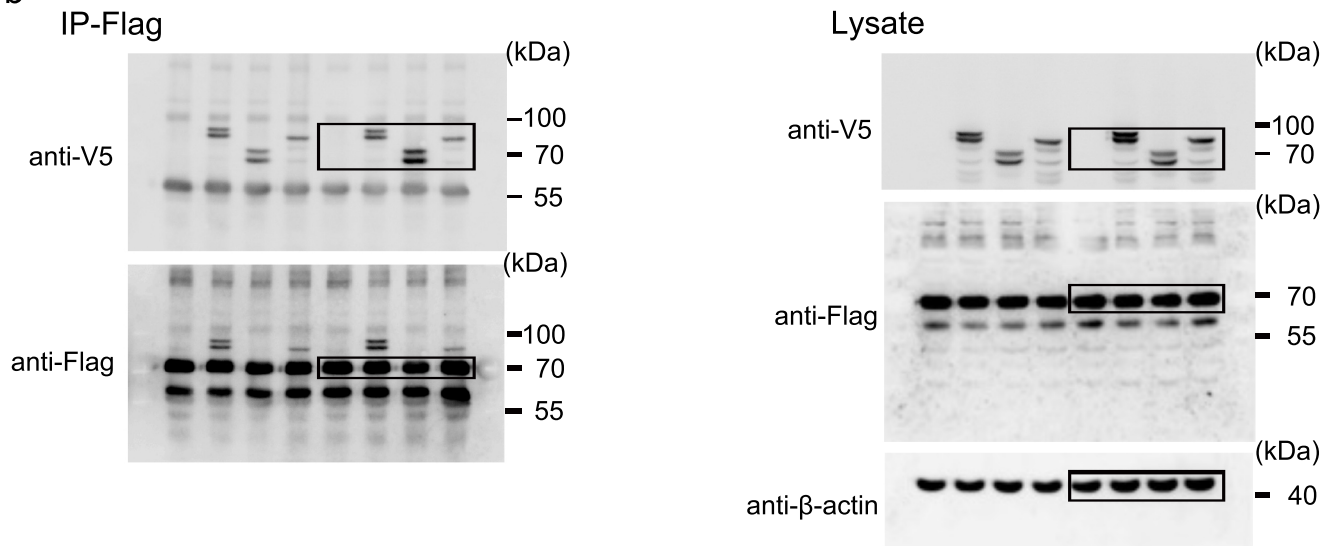

4c

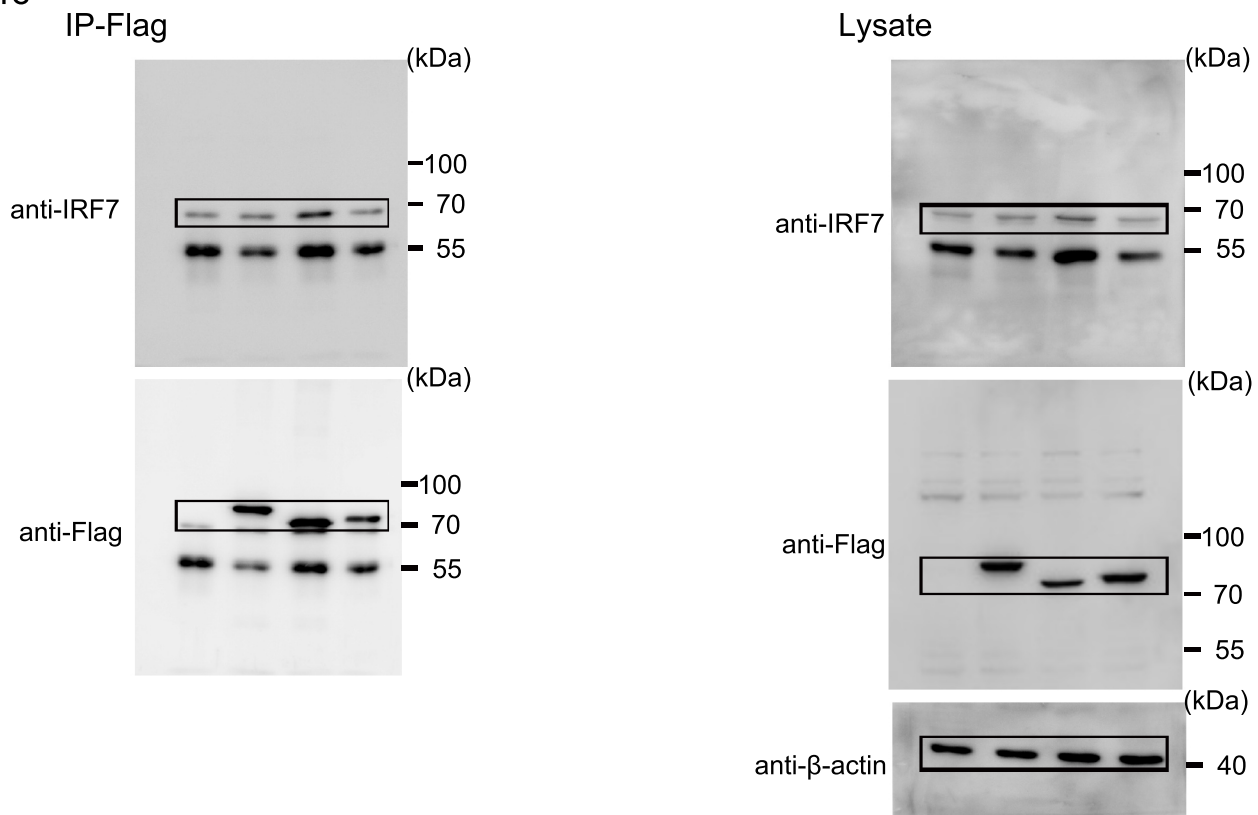



5a

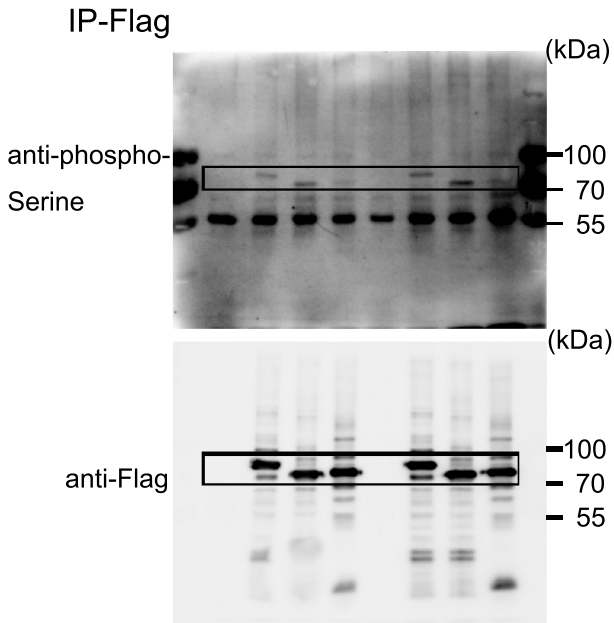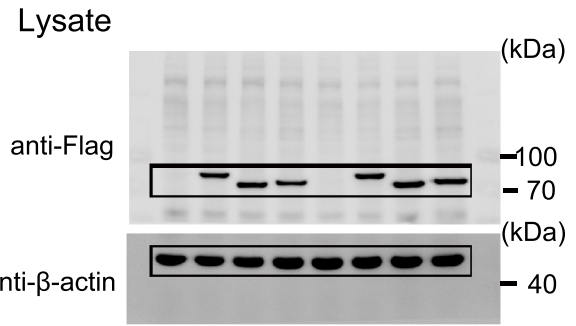

5b

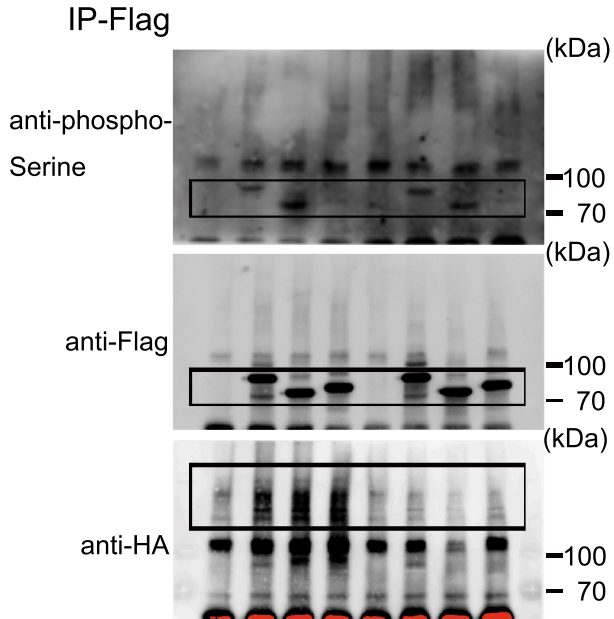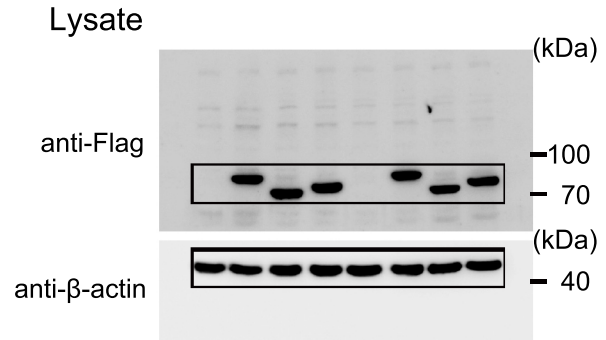

5c

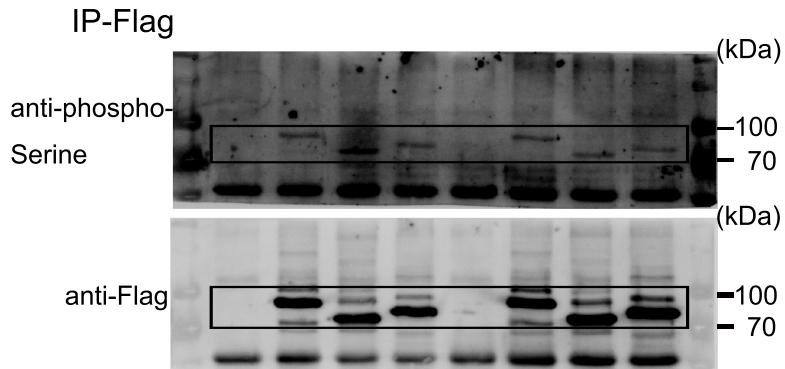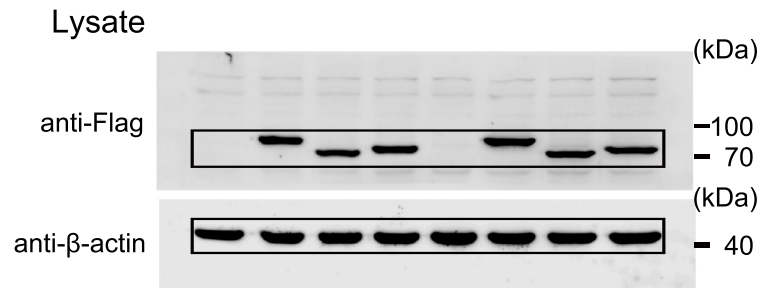

**Supplementary Figure 12-16: Full-scan images of representative Western blots, referred to Supplementary Figure 2-6**

S2a

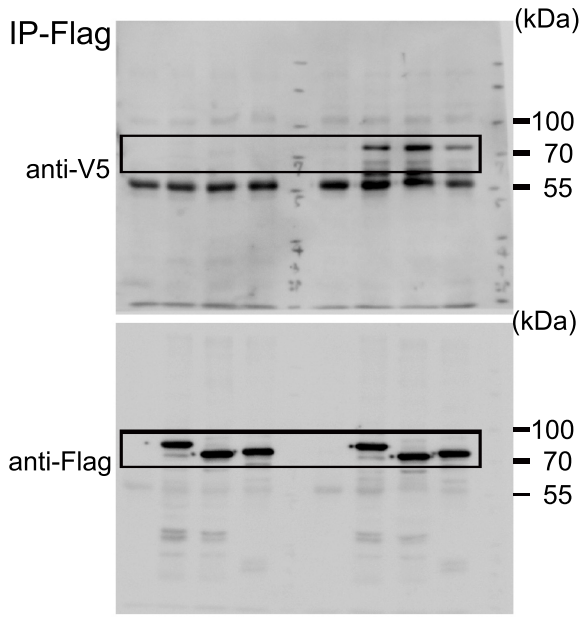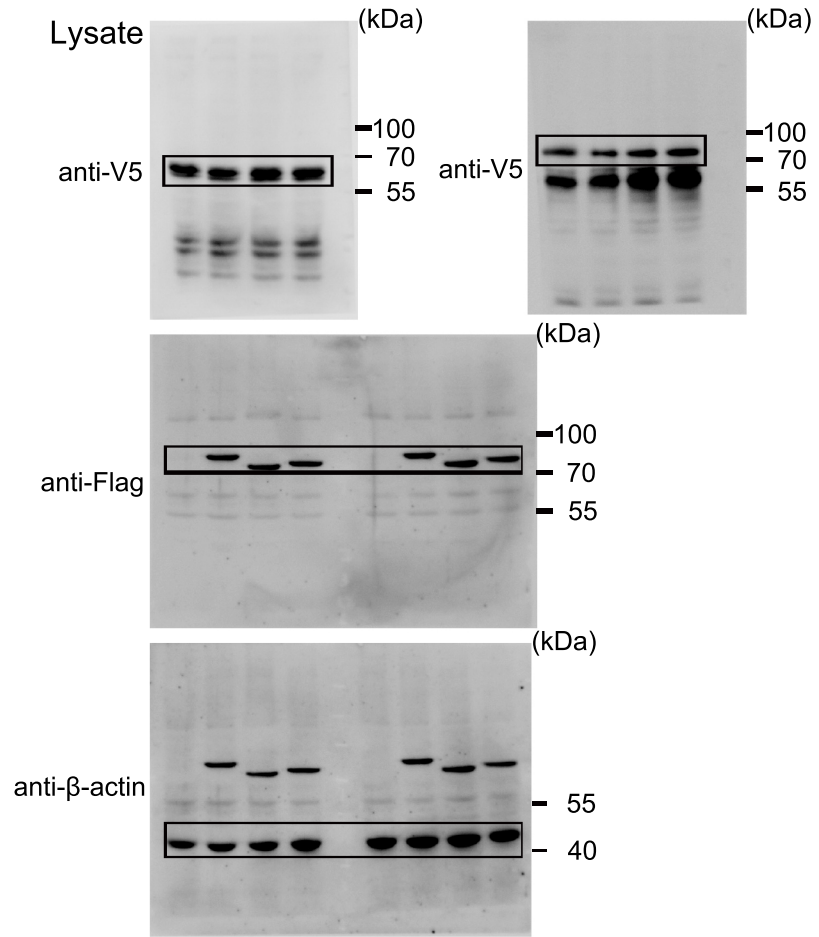

S3

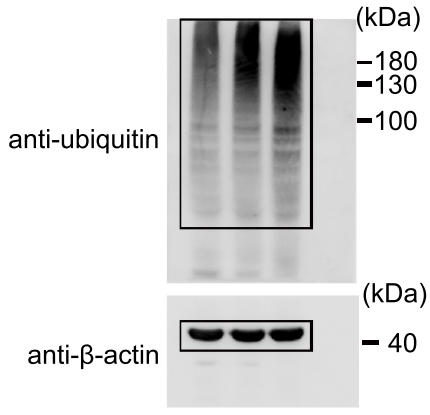

S4a

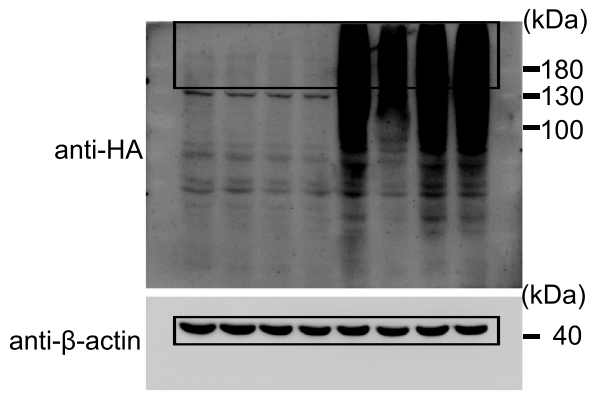

S4b

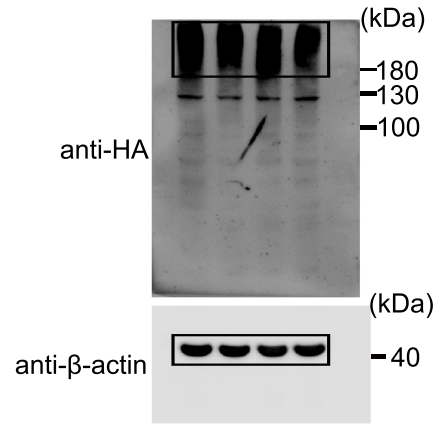

S4c

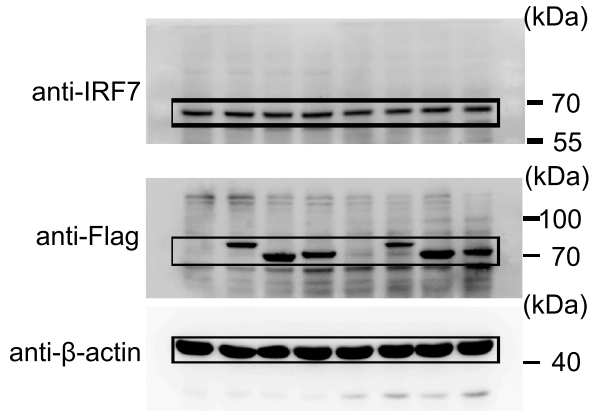

S4d

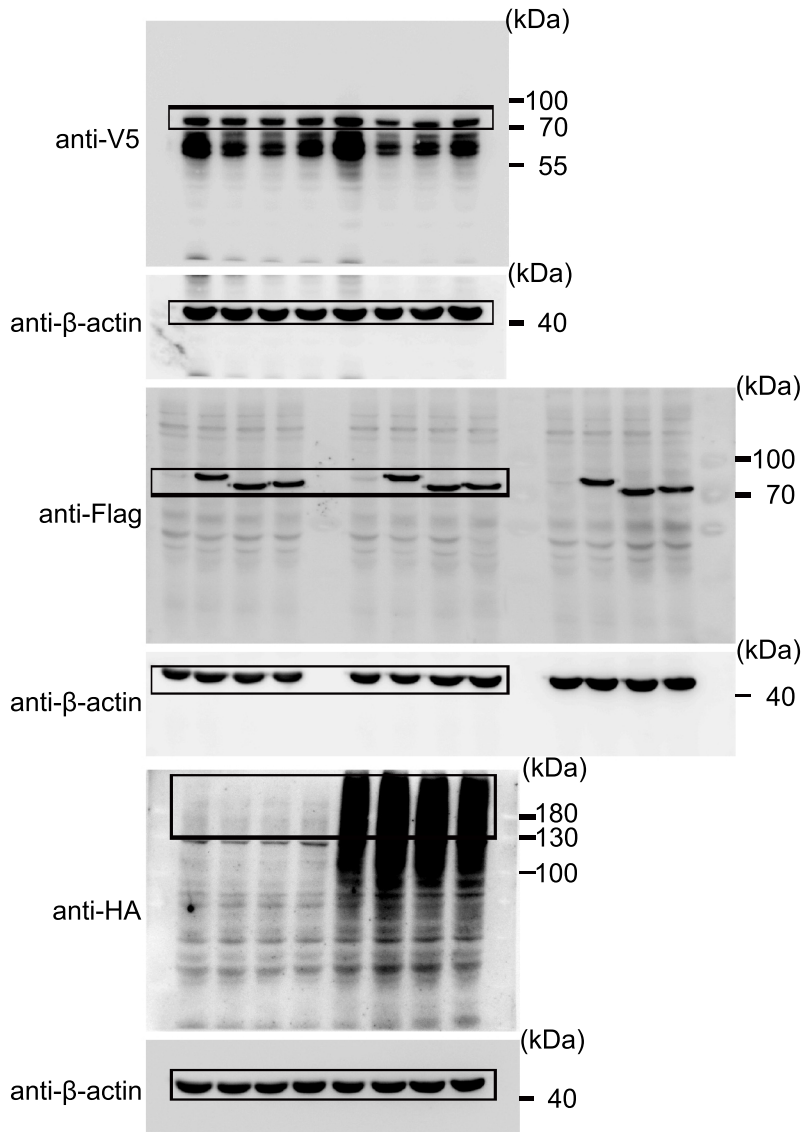

S4e

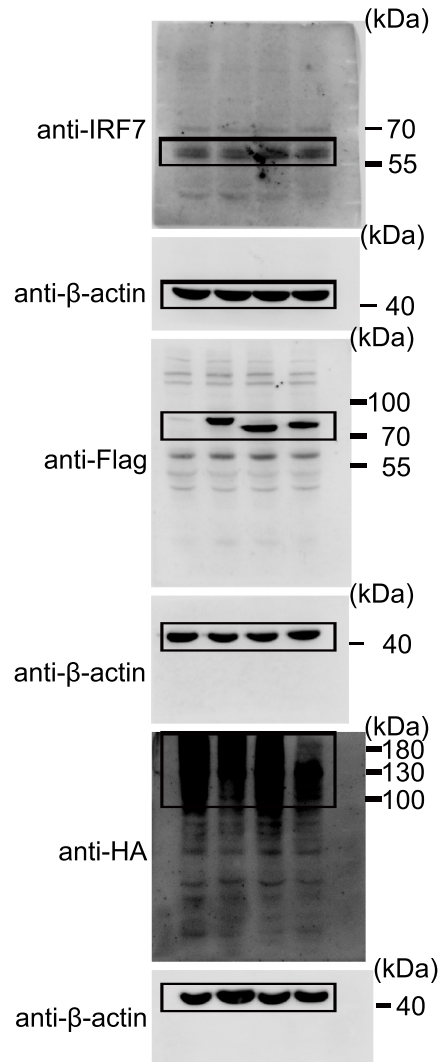

## S5a

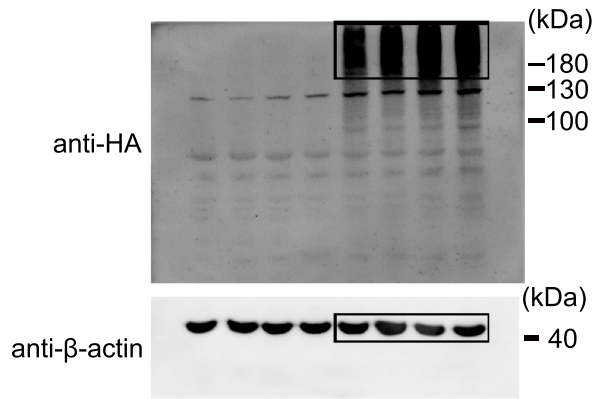

## S5b

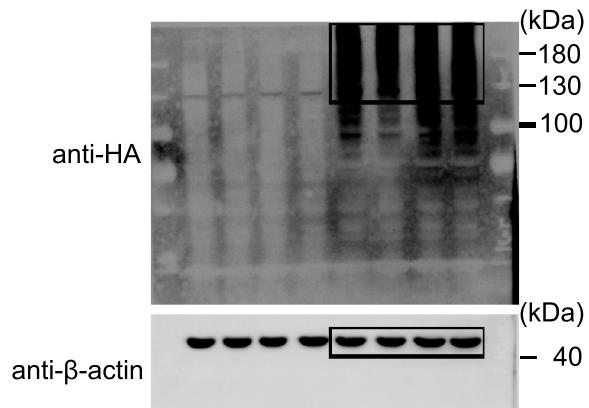

## S5c

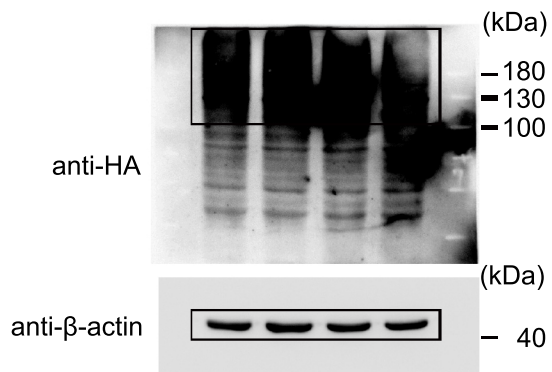

## S5d

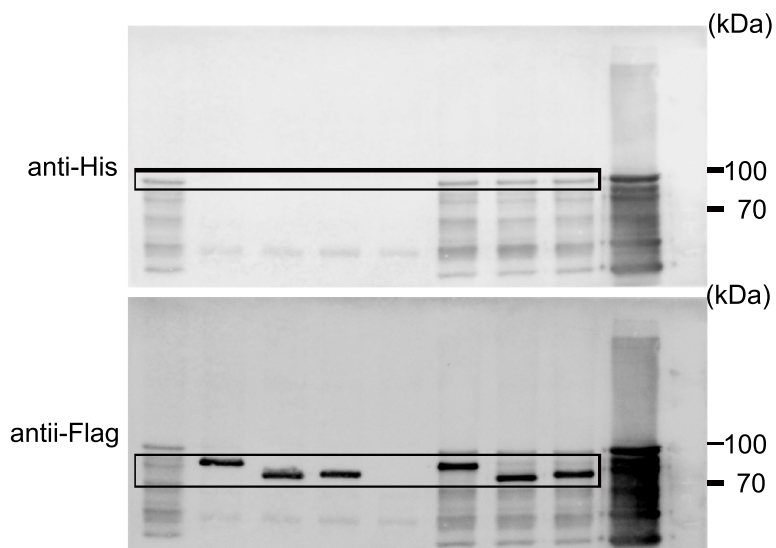

### S6a

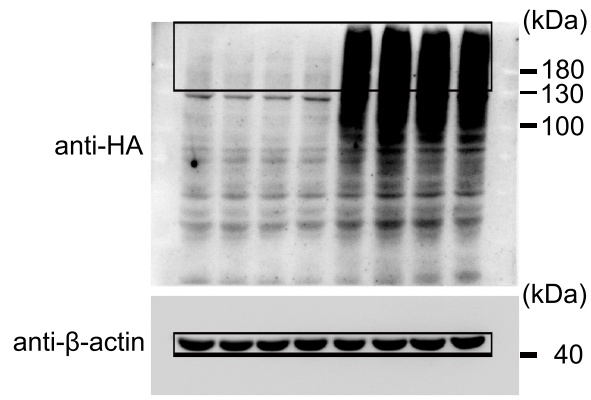

### S6b

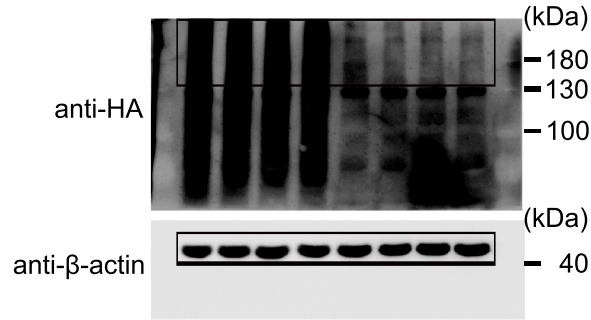

### S6c

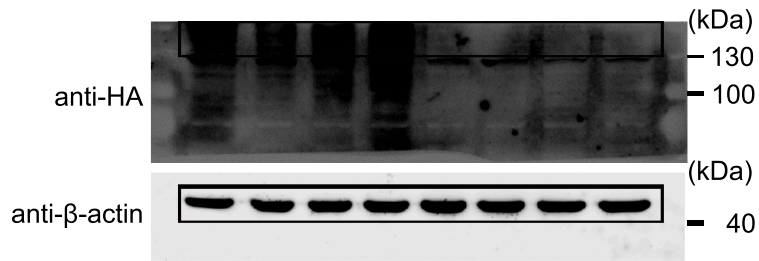

Supplement: 42003_2021_2187_MOESM2_ESM.pdf [file 42003_2021_2187_MOESM2_ESM.pdf]
