# Supplementary material for: IKKε isoform switching governs the immune response against EV71 infection
Source: PubMed Central journal article supplement (PMC8172566; doi:10.1038/s42003-021-02187-x), 2021-06-02
Supplement: 42003_2021_2187_MOESM3_ESM.pdf [file 42003_2021_2187_MOESM3_ESM.pdf]

## **Description of Additional Supplementary Files**

**File name:** Supplementary Data

**Description:** The Source data tab provides a legend for interpreting the source data presented in 'Supplementary data tabs 1-12' within the excel file.
